# Supplementary material for: Insight into Point Defects and Complex Defects in β-Mo2C and Carbide Evolution from First Principles
Source: MDPI journal article supplement (doi:10.3390/ma15134719), 2022-07-05
Supplement: s1 [file s1]

## Supplementary information

### Insight into point defects in $\beta$ -Mo<sub>2</sub>C and carbide evolution from first principles

Jing Guo, Yunli Feng, Xiaoliang Qing, Cong Tang, Li Wang, Qingxiang Yang, Xuejun

Ren

#### Figures

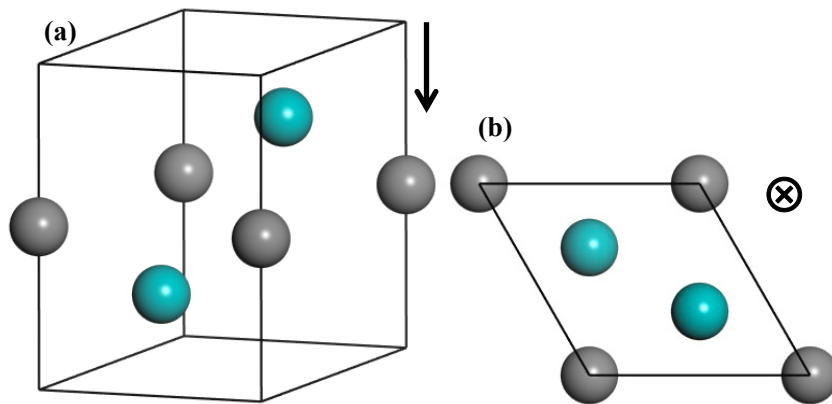

**Figure S1** Schematic diagram of Mo<sub>2</sub>C structure of unit cell (a) and along (b) [0001] direction.

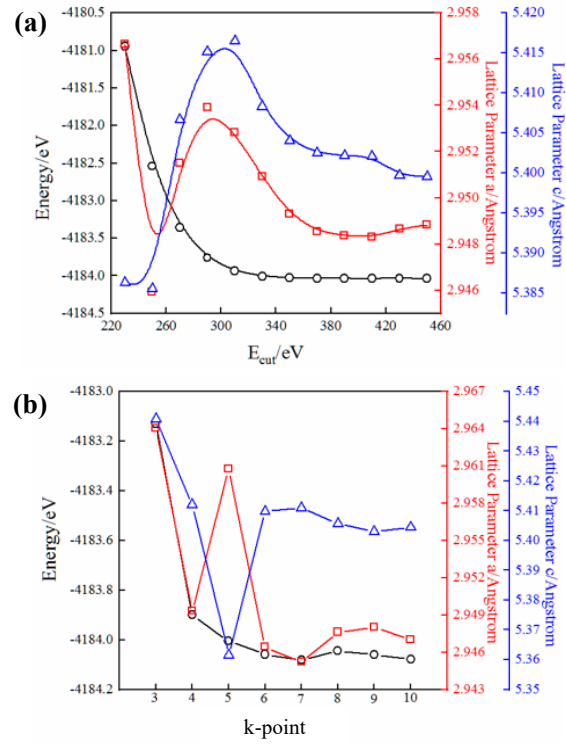

**Figure S2** Convergence tests for Mo<sub>2</sub>C unit cell: Change of total energy and lattice parameter for Mo<sub>2</sub>C with different (a) cutoff energies and (b) k-points.

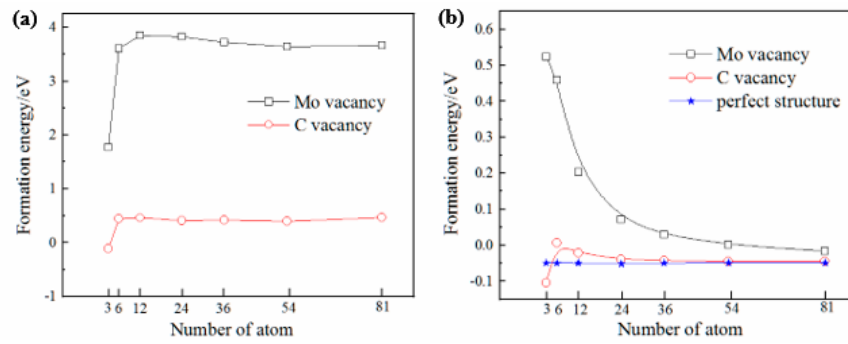

**Figure S3** Convergence test for Mo<sub>2</sub>C supercell: (a) formation energy of vacancy, (b) formation energy of bulk material with vacancy.

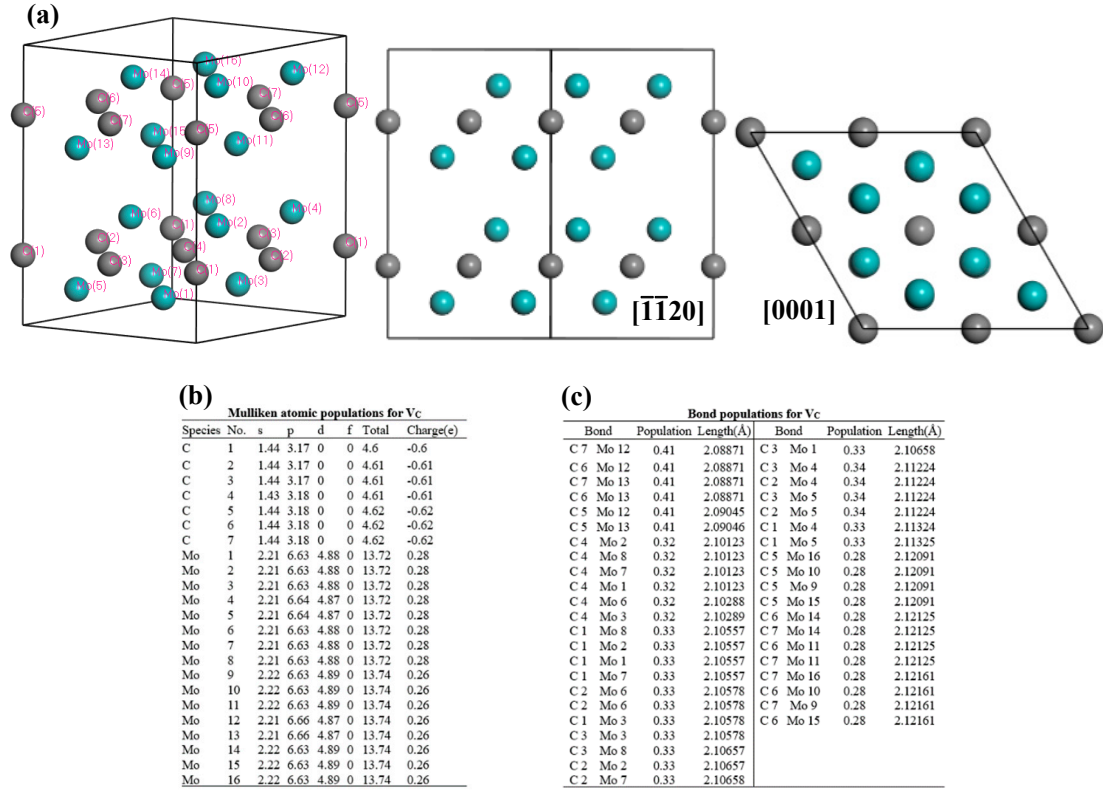

**Figure S4** Structure model of Mo<sub>2</sub>C supercell with V<sub>C</sub> after optimization (a), as well as atomic population (b) and bond population (c).

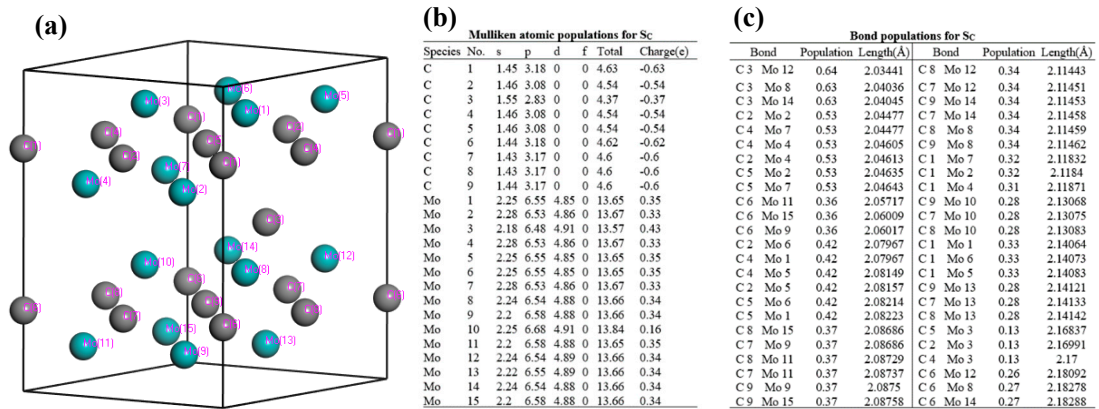

**Figure S5** 3D structure model of Mo<sub>2</sub>C supercell with S<sub>C</sub> after optimization (a), as well as atomic population (b) and bond population (c).

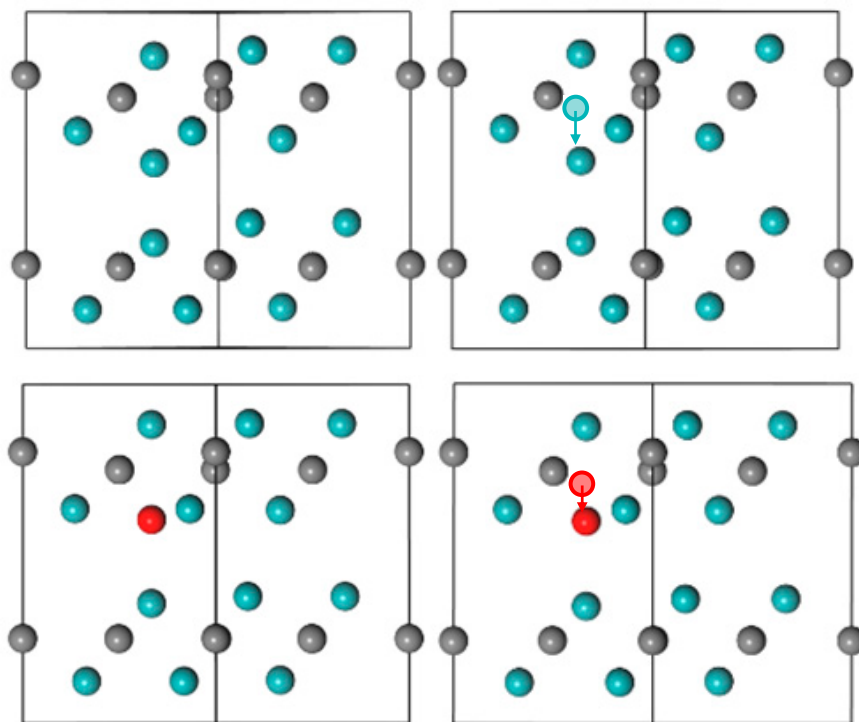

**Figure S6** Structure model of Mo<sub>2</sub>C supercell with interstitial atom after optimization: (a) I<sub>Mo</sub>(I), (b) I<sub>Mo</sub>(II), (c) I<sub>V</sub>(I) and (d) I<sub>V</sub>(II). Semitransparent cyan and red balls represent the original position for Mo and V atom.

## Tables

**Table S1** Total energy for different Mo<sub>2</sub>C supercells with or without vacancy defects and energy for Mo and C atom (eV).

| Supercell | $E_{\text{perf}}(\text{N})$ | $E_{\text{vacancy}}^{\text{def}}$ |                | $E(\text{Mo})$ | $E(\text{C})$ |
|-----------|-----------------------------|-----------------------------------|----------------|----------------|---------------|
|           |                             | $V_{\text{Mo}}$                   | $V_{\text{C}}$ |                |               |
| 1×1×1     | -4184.059                   | -2245.430                         | -4029.102      | -1936.860      | -155.071      |
| 1×1×2     | -8368.118                   | -6427.65                          | -8212.604      | -1936.860      | -155.071      |
| 1×2×2     | -16736.235                  | -14795.522                        | -16580.703     | -1936.860      | -155.071      |
| 2×2×2     | -32232.884                  | -31531.833                        | -33317.045     | -1936.860      | -155.071      |
| 3×2×2     | -50208.717                  | -48268.129                        | -50053.229     | -1936.860      | -155.071      |
| 3×3×2     | -75313.075                  | -73372.568                        | -75157.606     | -1936.860      | -155.071      |
| 3×3×3     | -112969.601                 | -111029.074                       | -112814.06     | -1936.860      | -155.071      |

**Table S2** Calculated formation energy of vacancy and formation energy of bulk materials with vacancy (eV).

| Supercell | $E_{\text{vacancy}}^{\text{def}}$ |                | $E_{\text{vacancy}}^{\text{bulk}}$ |                | perfect |
|-----------|-----------------------------------|----------------|------------------------------------|----------------|---------|
|           | $V_{\text{Mo}}$                   | $V_{\text{C}}$ | $V_{\text{Mo}}$                    | $V_{\text{C}}$ |         |
| 1×1×1     | 5.132                             | 0.930          | 0.239                              | -0.361         | -0.433  |
| 1×1×2     | 5.050                             | 0.402          | -0.130                             | -0.440         | -0.437  |
| 1×2×2     | 4.797                             | -0.088         | -0.296                             | -0.453         | -0.430  |
| 2×2×2     | 4.385                             | -0.880         | -0.367                             | -0.451         | -0.436  |
| 3×2×2     | 4.555                             | -0.726         | -0.393                             | -0.449         | -0.436  |
| 3×3×2     | 4.462                             | -0.803         | -0.389                             | -0.45          | -0.435  |
| 3×3×3     | 4.437                             | -0.907         | -0.376                             | -0.448         | -0.436  |

**Table S3** Total energy for Mo<sub>2</sub>C supercells with substitution and interstitial defects (eV).

| Defect type  | $E_{\text{perf}}(\text{N})$ | $E^{\text{def}}$                            |                                            |
|--------------|-----------------------------|---------------------------------------------|--------------------------------------------|
|              |                             | Mo                                          | C                                          |
| Substation   | -32232.884                  | -34007.186 ( $S_{\text{Mo}}$ )              | -30446.863 ( $S_{\text{C}}$ )              |
| Interstitial | -32232.884                  | -34159.492 ( $I_{\text{Mo}}(\text{I,II})$ ) | -32384.745 ( $I_{\text{C}}(\text{I,II})$ ) |

**Table S4** Total energy for Mo<sub>2</sub>C supercells with V-related defects and energy for V atom (eV).

|                  | $S_{\text{V-Mo}}$ | $S_{\text{V-C}}$ | $I_{\text{V}}(\text{I})$ | $I_{\text{V}}(\text{II})$ |
|------------------|-------------------|------------------|--------------------------|---------------------------|
| $E^{\text{def}}$ | -32273.271        | -34048.676       | 34202.379                | 34201.550                 |
